# Supplementary figures and images for: Functionally diverse human T cells recognize non-microbial antigens presented by MR1
Source: eLife journal article supplement (doi:10.7554/elife.24476), 2017-05-18

**A**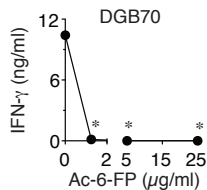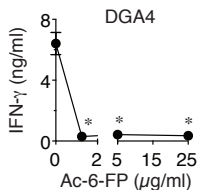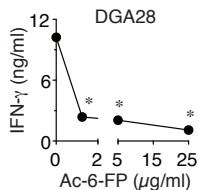**B**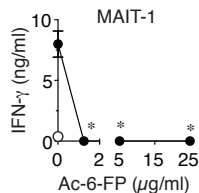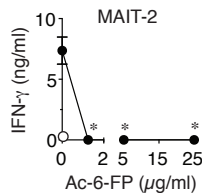

○ no Ag  
● *E. coli*

**C**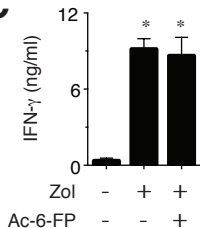**D**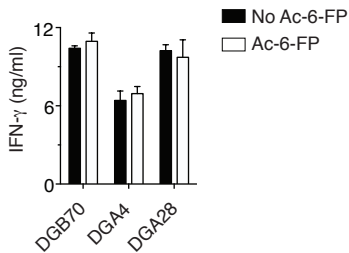**E**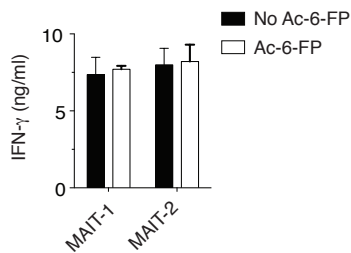

Figure 4-Figure Supplement 1

Supplement: supp [file elife_poa_e24476_Figure_4_Figure_Supplement_1.pdf › elife_poa_e24476_Figure_4_Figure_Supplement_1.pdf]

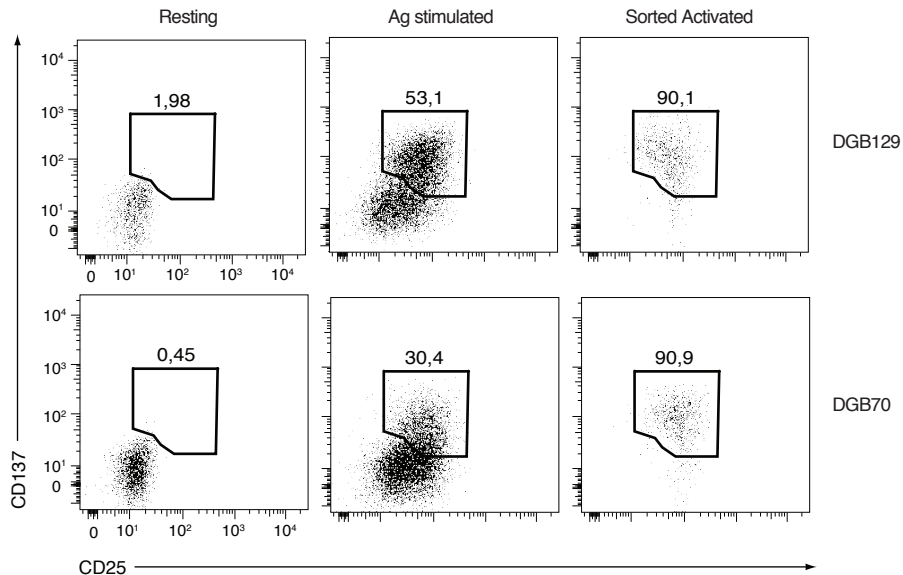

Figure 6-Figure Supplement 1

Supplement: supp [file elife_poa_e24476_Figure_6_Figure_Supplement_1.pdf › elife_poa_e24476_Figure_6_Figure_Supplement_1.pdf]

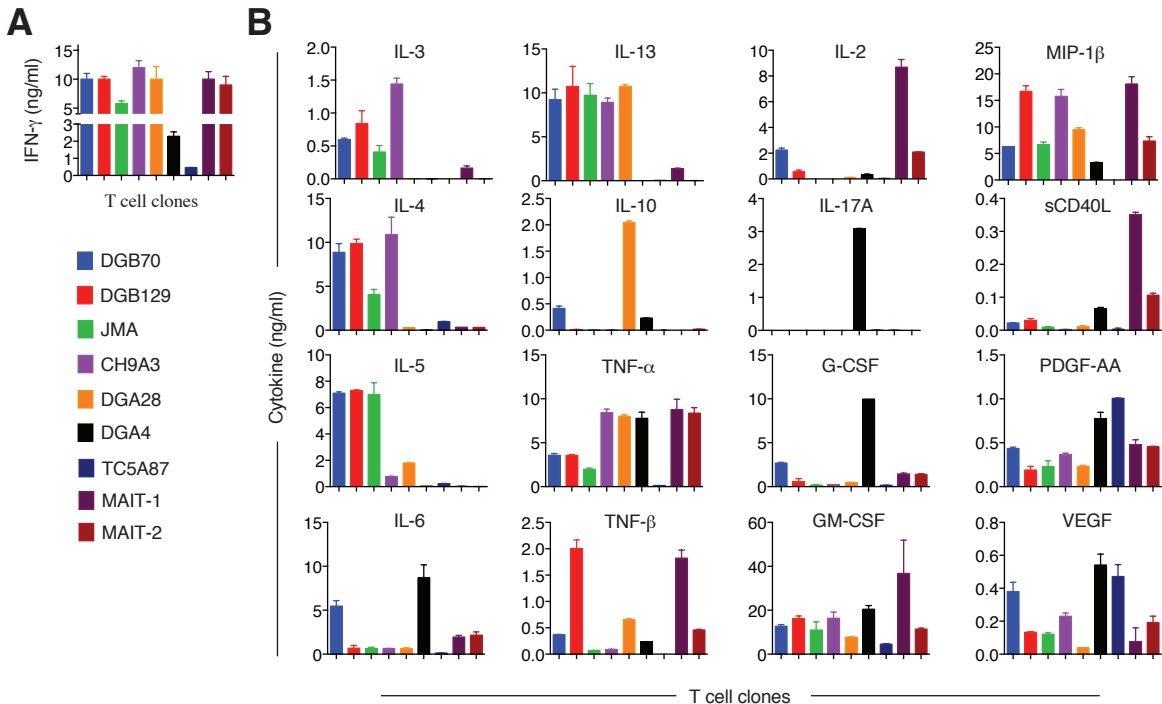

Figure 7-Figure Supplement 1

Supplement: supp [file elife_poa_e24476_Figure_7_Figure_Supplement_1.pdf › elife_poa_e24476_Figure_7_Figure_Supplement_1.pdf]

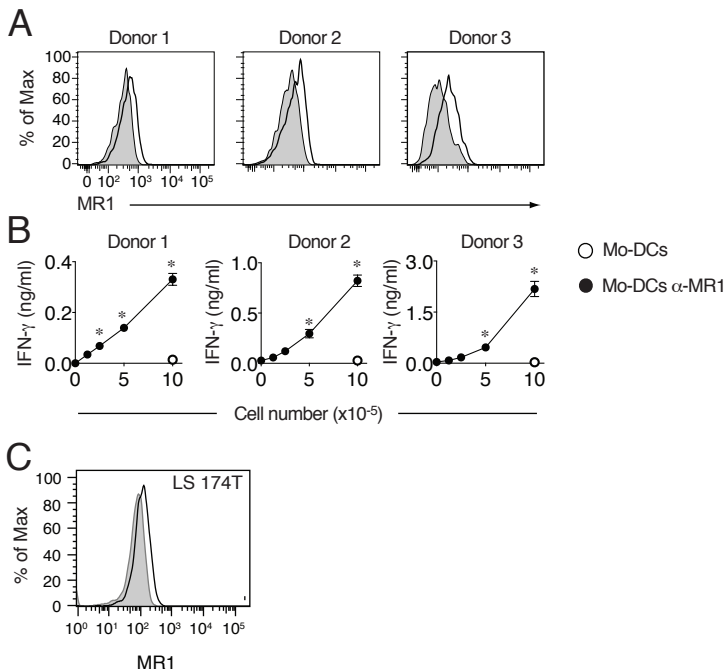

Figure 8-Figure Supplement 1

Supplement: supp [file elife_poa_e24476_Figure_8_Figure_Supplement_1.pdf › elife_poa_e24476_Figure_8_Figure_Supplement_1.pdf]
